# Supplementary material for: Clinical associations with a polygenic predisposition to benign lower white blood cell counts
Source: PubMed Central journal article supplement (PMC11035609; doi:10.1038/s41467-024-47804-5), 2024-04-22
Supplement: 41467_2024_47804_MOESM1_ESM.pdf [file 41467_2024_47804_MOESM1_ESM.pdf]

## Supplemental Figure and Tables

1. **Supplemental Figure 1:** Associations with hematological malignancies and auto-immune diseases.
2. **Supplemental Figure 2:** PGS associations with measured minimum WBC counts among 11,694 BioVU participants.
3. **Supplemental Figure 3:** Hosmer-Lemeshow goodness-of fit plot from the logistic regression model between the  $PGS_{WBC}$  and having an ICD code related to a low WBC count.
4. **Supplemental Figure 4:** Kaplan-Meier plot of frequency of neutropenia with taxane treatment.
5. **Supplemental Figure 5:** Associations with drug induced leukopenia due to azathioprine in the Michigan Genomics Initiative cohort.
6. **Supplemental Figure 6:** Scatter plots of the first 2 genetic principal components for the HapMap reference populations and the BioVU cohort.
7. **Supplemental Figure 7:** Distribution of the  $PGS_{WBC}$  in the BioVU cohort and the individual study populations.
8. **Supplemental Table 1:** Associations between the  $PGS_{WBC}$  and malignant hematological malignancies and auto-immune diseases.
9. **Supplemental Table 2:** Association between the  $PGS_{WBC}$  based on quintiles of SNPs constructed based on the distribution of SNP effect sizes and malignant hematological phenotypes.
10. **Supplemental Table 3:** Count of the number of malignant hematological phenotypes with an excess of nominal SNP associations, stratified by quintiles based on the distribution of SNP effect sizes.
11. **Supplemental Table 4:** Sensitivity analyses examining the impacts of excluding SNPs from the  $PGS_{WBC}$  that are nominally associated with hematological phenotypes at select significance thresholds.
12. **Supplemental Table 5:** Characteristics of BioVU participants in the bone marrow biopsy cohort.
13. **Supplemental Table 6:** Sensitivity analyses examining the impacts of excluding SNPs from the  $PGS_{WBC}$  that are nominally associated with hematological phenotypes at select significance thresholds on biopsy outcomes.
14. **Supplemental Table 7:** Characteristics of BioVU participants in the taxane leukopenia study.

15. **Supplemental Table 8:** Characteristics of Michigan Genomics Initiative participants in the azathioprine leukopenia study.
16. **Supplemental Table 9:** Characteristics of BioVU participants in the azathioprine discontinuation study.
17. **Supplemental Table 10:** List of keywords used to identify records with a mention of a low WBC count.
18. **Supplemental Table 11:** Diseases with associations reported in the GWAS catalog for which SNPs were excluded when constructing the  $\text{PGS}_{\text{WBC}}$ .

**Supplemental Figure 1. Associations with hematological malignancies and auto-immune diseases.** Associations between the  $PGS_{WBC}$  and (A) hematological malignancies and (B) auto-immune diseases present among 71,078 BioVU participants. Odds-ratios are per standard deviation change in the  $PGS_{WBC}$ . For reference, associations with diagnoses of a decreased WBC count and neutropenia are shown in the same population.

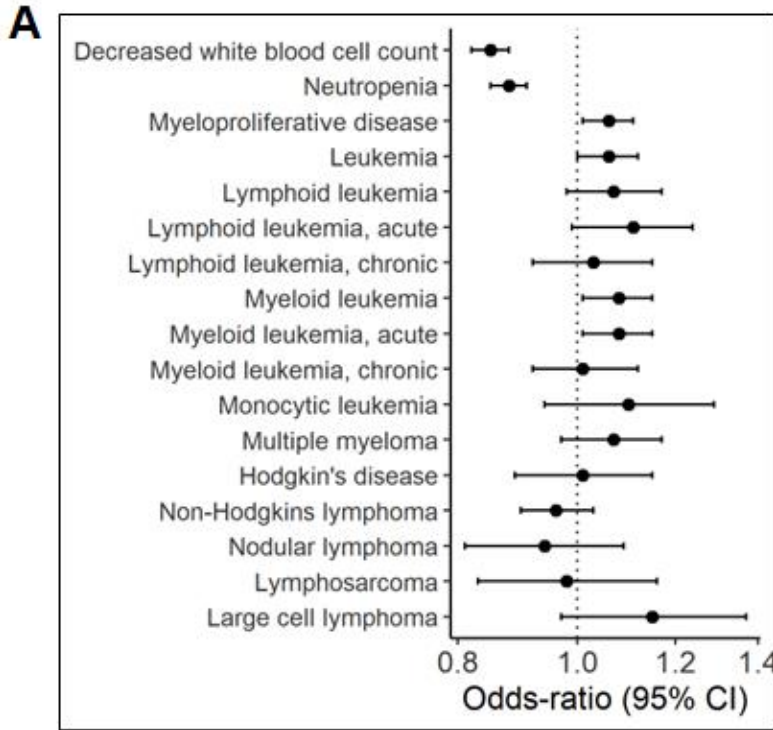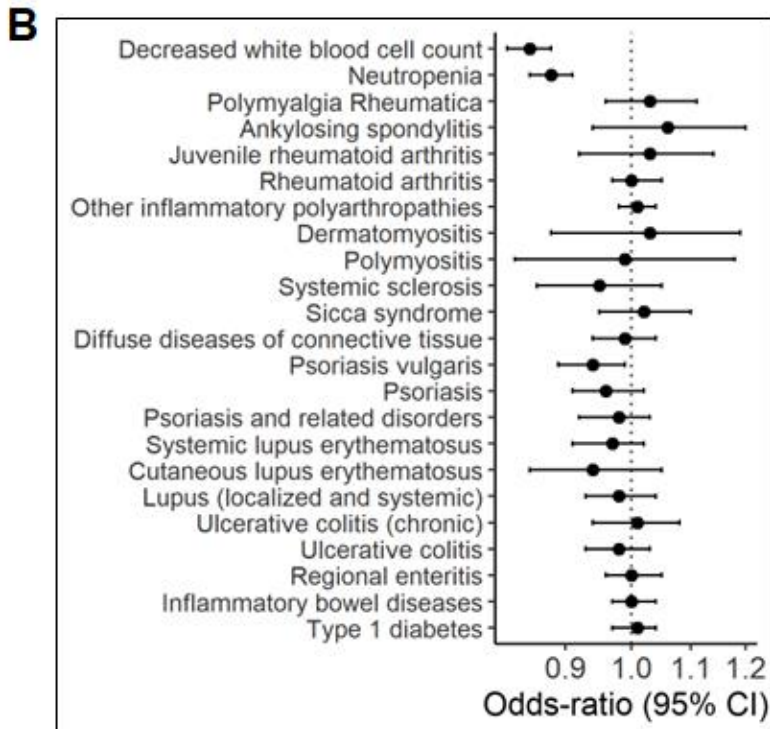

**Supplemental Figure 2: PGS associations with measured minimum WBC counts among 11,694 BioVU participants.** (a) Ranges of observed minimum WBC counts by  $PGS_{WBC}$  value. Ranges summarize WBC counts within sequential windows ( $\pm 0.2$  s.d.) across the range of the  $PGS_{WBC}$ . The dark line is the median value, the light grey ribbon represents the 5<sup>th</sup> to 95<sup>th</sup> percentiles of the range, and the dark grey ribbon represents the 2.5<sup>th</sup> to 5<sup>th</sup> percentile. The dashed red lines denote the upper and lower clinical reference ranges for the clinical assay used to measure the WBC count.

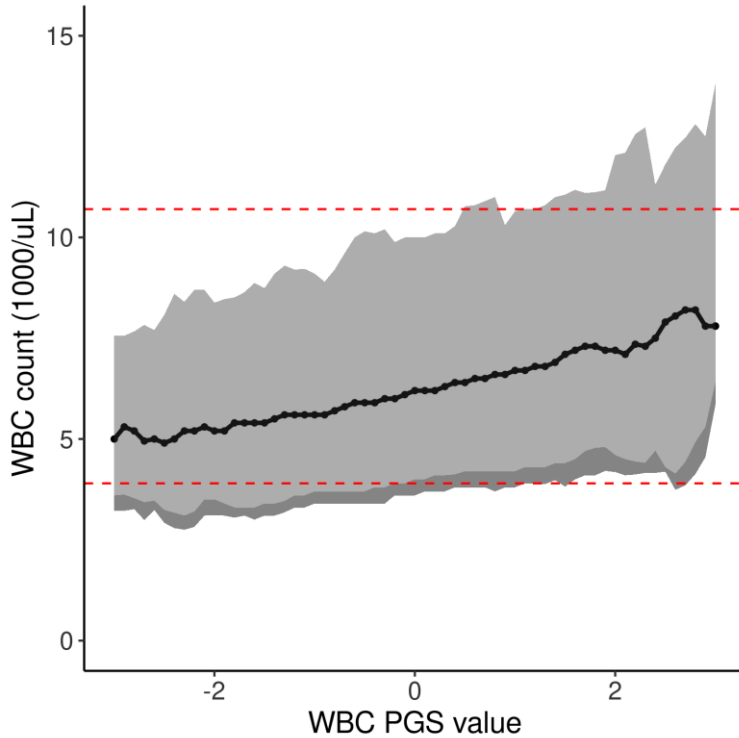

**Supplemental Figure 3: Hosmer-Lemeshow goodness-of fit plot from the logistic regression model between the PGS<sub>WBC</sub> and having an ICD code related to a low WBC count.**

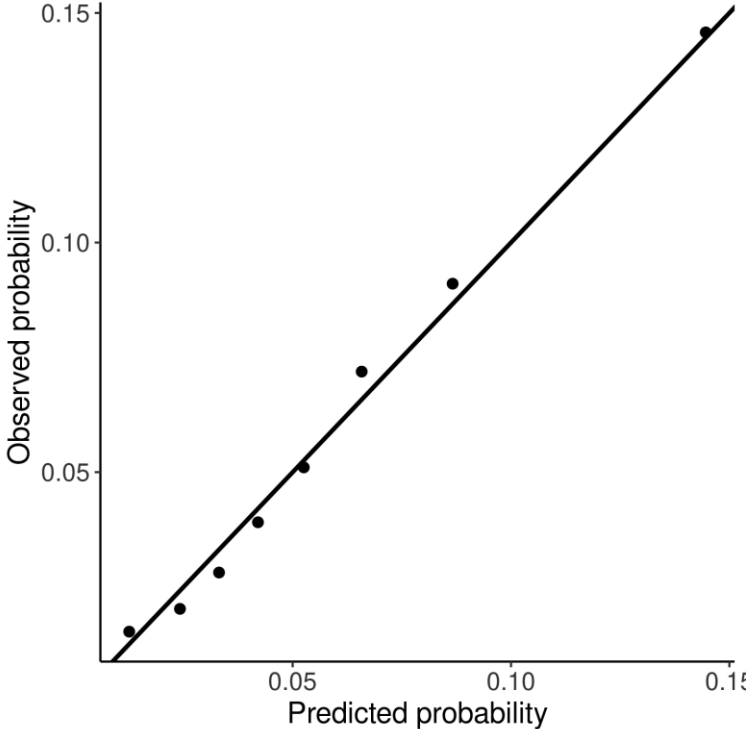

**Supplemental Figure 4: Kaplan-Meier plot of frequency of neutropenia with taxane treatment.** Kaplan-Meier curves summarizing frequencies of neutropenia (absolute neutrophil count < 1,500 cells/ $\mu$ l) after initiating treatment with taxane medications among 1,724 BioVU participants with a primary cancer. The low and high PGS<sub>WBC</sub> groups correspond to values < 1 s.d. below the mean and > 1 s.d. above the mean (high), respectively. The y-axis is the proportion of individuals with incident neutropenia.

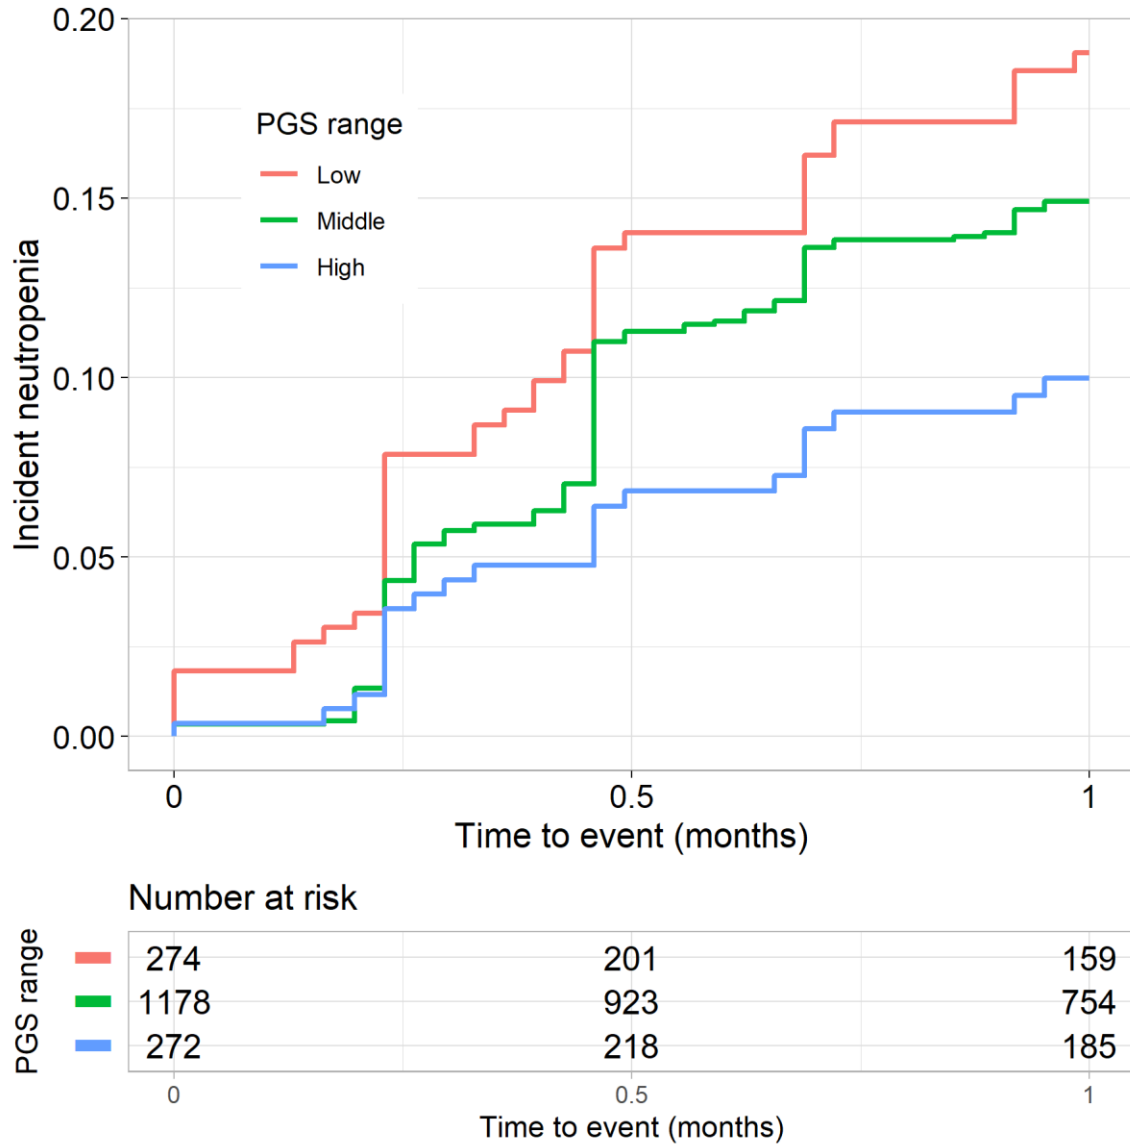

**Supplemental Figure 5: Associations with drug induced leukopenia due to azathioprine in the Michigan Genomics Initiative cohort.** (A) Summary of associations between the PGS and incident leukopenia, defined at different WBC count thresholds. (B) Kaplan-Meier plot of frequency of leukopenia with azathioprine treatment. Kaplan-Meier curves summarizing frequencies of a WBC count <4,000 cells/ul after initiating treatment with azathioprine among 354 MGI participants with auto-immune disease. The low and high PGS groups correspond to values <1 s.d. below the mean and >1 s.d. above the mean (high), respectively.

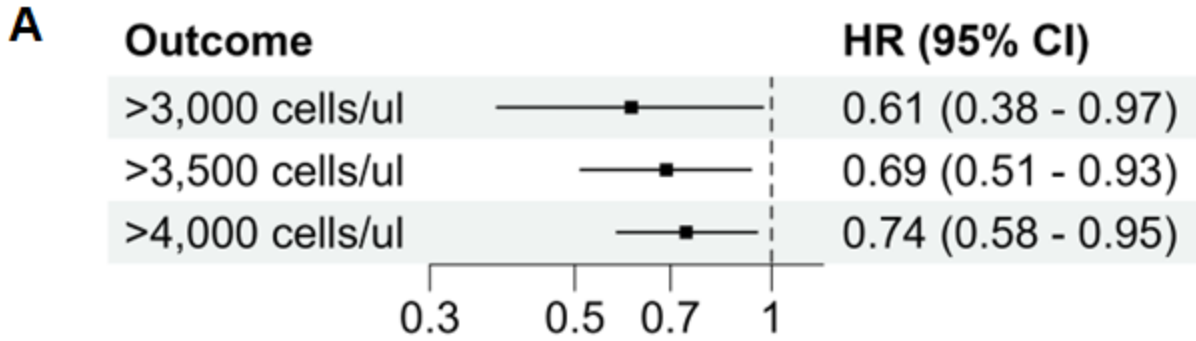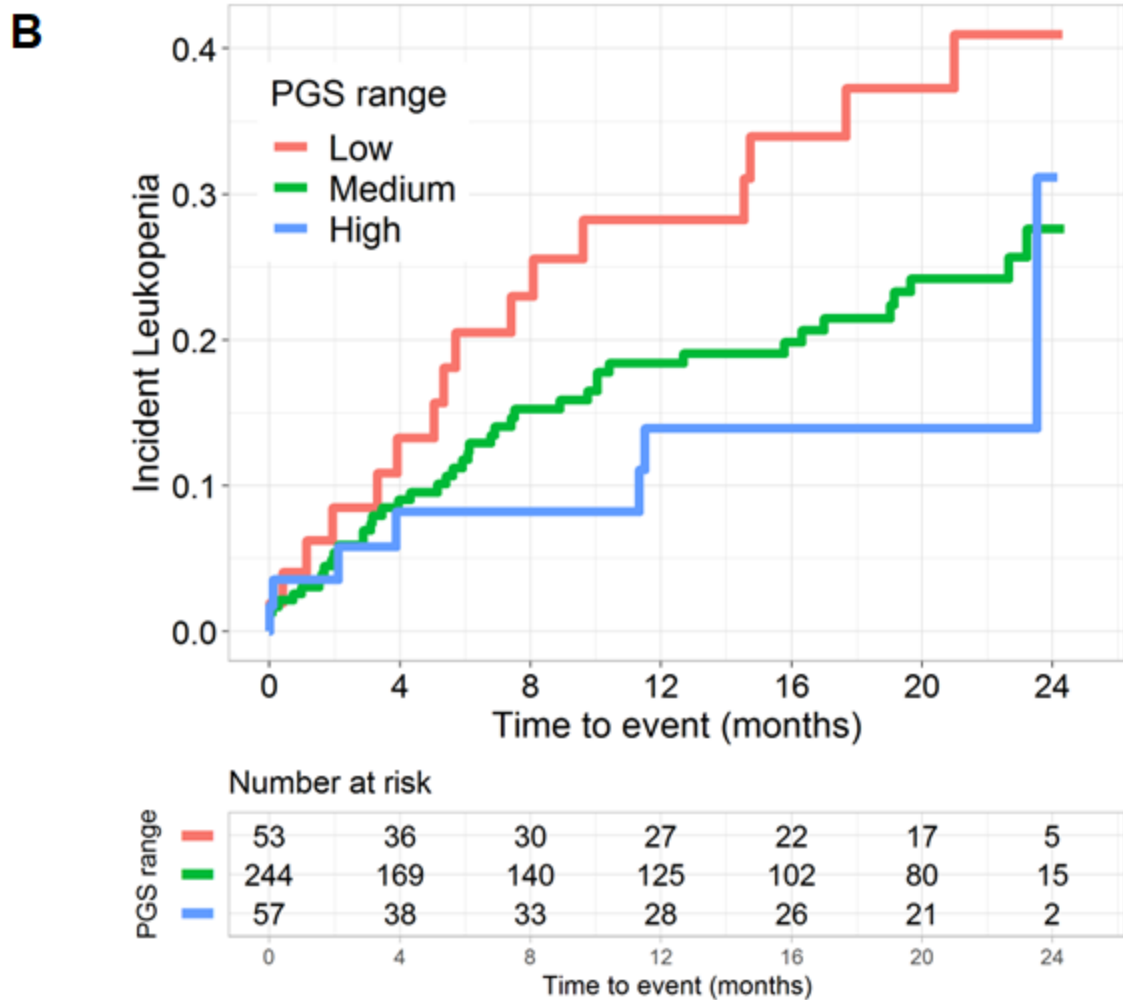

**Supplemental Figure 6: Scatter plots of the first 2 genetic principal components for the HapMap reference populations and the BioVU cohort.** Principal components were fit to the combined BioVU and HapMap data sets. A) HapMap reference populations. B) The BioVU population. Participants identified as EA are included in the present study and are referred to as “European ancestry”.

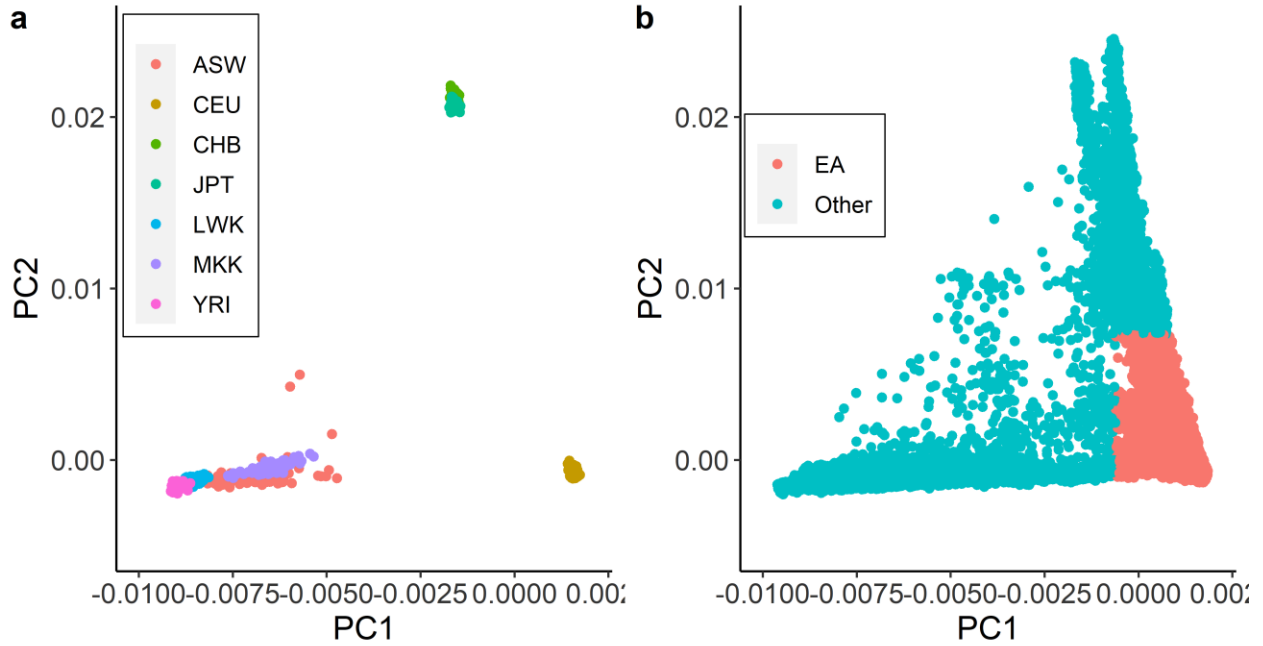



**Supplemental Figure 7: Distribution of the  $PGS_{WBC}$  in the BioVU cohort and the individual study populations.** The PGS was set to have mean of 0 and standard deviation of 1 in the full BioVU European ancestry population (“All”, n= 71,078)

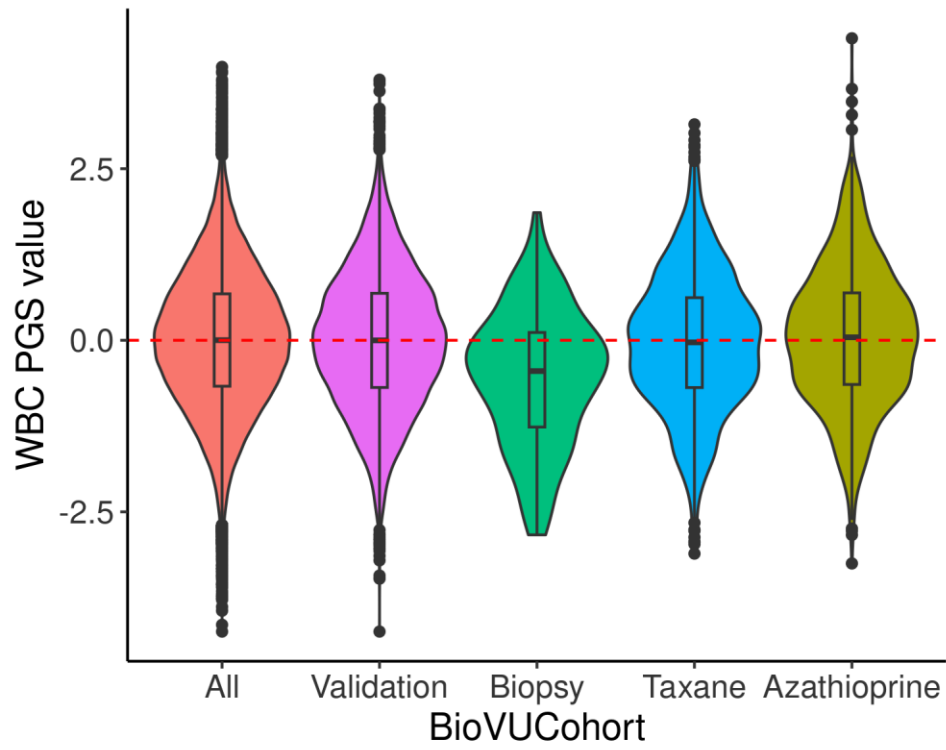

**Supplemental Table 1: Associations between the PGS<sub>WBC</sub> and PheWAS codes for autoimmune diseases and malignant hematological malignancies among BioVU participants.** Odds ratios are from a logistic regression model, adjusted for age, sex and PCs. P-values are based on a 2-sided test. False Discovery Rate p-values are presented.

| PheWAS Code | Description                                                      | Number of cases | Number of controls | Odds ratio | 95% CI        | p-value | FDR p-value |
|-------------|------------------------------------------------------------------|-----------------|--------------------|------------|---------------|---------|-------------|
| 200         | Myeloproliferative disease                                       | 1778            | 66075              | 1.06       | (1.01 - 1.11) | 0.03    | 0.18        |
| 201         | Hodgkin's disease                                                | 251             | 64757              | 1.01       | (0.89 - 1.15) | 0.88    | 0.90        |
| 202.2       | Non-Hodgkins lymphoma                                            | 905             | 65268              | 0.96       | (0.9 - 1.03)  | 0.22    | 0.63        |
| 202.21      | Nodular lymphoma                                                 | 189             | 64674              | 0.94       | (0.81 - 1.09) | 0.41    | 0.71        |
| 202.23      | Lymphosarcoma                                                    | 150             | 64682              | 0.98       | (0.83 - 1.16) | 0.83    | 0.90        |
| 202.24      | Large cell lymphoma                                              | 140             | 64565              | 1.15       | (0.97 - 1.37) | 0.10    | 0.42        |
| 204         | Leukemia                                                         | 1500            | 65847              | 1.06       | (1.00 - 1.12) | 0.03    | 0.18        |
| 204.1       | Lymphoid leukemia                                                | 528             | 65843              | 1.07       | (0.98 - 1.17) | 0.12    | 0.44        |
| 204.11      | Lymphoid leukemia, acute                                         | 321             | 65632              | 1.11       | (0.99 - 1.24) | 0.07    | 0.35        |
| 204.12      | Lymphoid leukemia, chronic                                       | 336             | 65573              | 1.03       | (0.92 - 1.15) | 0.59    | 0.84        |
| 204.2       | Myeloid leukemia                                                 | 945             | 65631              | 1.08       | (1.01 - 1.15) | 0.02    | 0.18        |
| 204.21      | Myeloid leukemia, acute                                          | 881             | 65665              | 1.08       | (1.01 - 1.15) | 0.03    | 0.18        |
| 204.22      | Myeloid leukemia, chronic                                        | 436             | 60491              | 1.01       | (0.92 - 1.12) | 0.76    | 0.90        |
| 204.3       | Monocytic leukemia                                               | 163             | 62031              | 1.10       | (0.94 - 1.29) | 0.24    | 0.63        |
| 204.4       | Multiple myeloma                                                 | 461             | 57930              | 1.07       | (0.97 - 1.17) | 0.17    | 0.52        |
| 250.1       | Type 1 diabetes                                                  | 3697            | 47540              | 1.01       | (0.97 - 1.04) | 0.64    | 0.84        |
| 555         | Inflammatory bowel disease and other gastroenteritis and colitis | 2935            | 43248              | 1.00       | (0.97 - 1.04) | 0.82    | 0.90        |
| 555.1       | Regional enteritis                                               | 2489            | 43328              | 1.00       | (0.96 - 1.05) | 0.85    | 0.90        |
| 555.2       | Ulcerative colitis                                               | 1907            | 43022              | 0.98       | (0.93 - 1.03) | 0.37    | 0.70        |
| 555.21      | Ulcerative colitis (chronic)                                     | 826             | 43110              | 1.01       | (0.94 - 1.08) | 0.86    | 0.90        |
| 695.4       | Lupus (localized and systemic)                                   | 1222            | 54717              | 0.98       | (0.93 - 1.04) | 0.61    | 0.84        |
| 695.41      | Cutaneous lupus erythematosus                                    | 345             | 55276              | 0.94       | (0.85 - 1.05) | 0.28    | 0.63        |
| 695.42      | Systemic lupus erythematosus                                     | 1264            | 54603              | 0.97       | (0.91 - 1.02) | 0.26    | 0.63        |
| 696         | Psoriasis and related disorders                                  | 1405            | 55312              | 0.98       | (0.92 - 1.03) | 0.39    | 0.70        |
| 696.4       | Psoriasis                                                        | 1270            | 54084              | 0.96       | (0.91 - 1.02) | 0.16    | 0.52        |
| 696.41      | Psoriasis vulgaris                                               | 1384            | 54013              | 0.94       | (0.89 - 0.99) | 0.03    | 0.18        |
| 709         | Diffuse diseases of connective tissue                            | 1664            | 56440              | 0.99       | (0.94 - 1.04) | 0.64    | 0.84        |
| 709.2       | Sicca syndrome                                                   | 738             | 51237              | 1.02       | (0.95 - 1.10) | 0.52    | 0.84        |
| 709.3       | Systemic sclerosis                                               | 405             | 55454              | 0.95       | (0.86 - 1.05) | 0.28    | 0.63        |
| 709.4       | Polymyositis                                                     | 130             | 56448              | 0.99       | (0.83 - 1.18) | 0.92    | 0.92        |
| 709.5       | Dermatomyositis                                                  | 178             | 57064              | 1.03       | (0.88 - 1.19) | 0.72    | 0.90        |
| 714         | Rheumatoid arthritis and other inflammatory polyarthropathies    | 3577            | 58856              | 1.01       | (0.98 - 1.04) | 0.59    | 0.84        |
| 714.1       | Rheumatoid arthritis                                             | 2623            | 58957              | 1.00       | (0.97 - 1.05) | 0.81    | 0.90        |
| 714.2       | Juvenile rheumatoid arthritis                                    | 382             | 56050              | 1.03       | (0.92 - 1.14) | 0.63    | 0.84        |
| 715.2       | Ankylosing spondylitis                                           | 268             | 53095              | 1.06       | (0.94 - 1.20) | 0.33    | 0.69        |
| 717         | Polymyalgia Rheumatica                                           | 738             | 67673              | 1.03       | (0.96 - 1.11) | 0.39    | 0.70        |

**Supplemental Table 2: Association between WBC PGSs constructed based on quintiles of the distribution of SNP effect sizes and malignant hematological phenotypes.**

| <b>SNP effect size quintile<sup>1</sup></b> | <b>Number of associated hematological phenotypes<sup>2</sup></b> | <b>Probability<sup>3</sup></b> | <b>Number of positive associations<sup>4</sup></b> | <b>Number of negative associations<sup>4</sup></b> |
|---------------------------------------------|------------------------------------------------------------------|--------------------------------|----------------------------------------------------|----------------------------------------------------|
| 1                                           | 0                                                                | 1                              | 0                                                  | 0                                                  |
| 2                                           | 3                                                                | 0.129                          | 0                                                  | 3                                                  |
| 3                                           | 1                                                                | 0.464                          | 0                                                  | 1                                                  |
| 4                                           | 8                                                                | 0.001                          | 8                                                  | 0                                                  |
| 5                                           | 1                                                                | 0.466                          | 1                                                  | 0                                                  |

Notes:

1. The lowest quintiles represent the SNPs with the smallest effect sizes.
2. Number of phenotypes with a nominal ( $p < 0.05$ ) association with the quintile-PGS among 15 malignant hematological phenotypes evaluated.
3. Probability of an association count greater than equal to that observed based on 1000 permutations of the PGS.
4. Number of the associations that are in a positive or negative (inverse) direction.

**Supplemental Table 3: Count of the number of malignant hematological phenotypes with an excess of nominal SNP associations, stratified by quintiles based on the distribution of SNP effect sizes.**

| <b>SNP effect size quintile<sup>1</sup></b> | <b>Number of hematological phenotypes with excess SNP associations<sup>2</sup></b> |
|---------------------------------------------|------------------------------------------------------------------------------------|
| 1                                           | 1                                                                                  |
| 2                                           | 1                                                                                  |
| 3                                           | 0                                                                                  |
| 4                                           | 4                                                                                  |
| 5                                           | 1                                                                                  |

Notes:

1. The lowest quintiles represent the SNPs with the smallest effect sizes.
2. Number of phenotypes that had more nominal ( $p < 0.05$ ) SNP associations than expected (based on a binomial probability  $p < 0.05$ ) among 15 malignant hematological phenotypes evaluated.

**Supplemental Table 4: Sensitivity analyses examining the impacts of excluding SNPs from the PGS<sub>WBC</sub> that are nominally associated with hematological phenotypes at select significance thresholds.** Odds ratios are from a logistic regression model, adjusted for age, sex and principal components. P-values are based on a 2-sided test.

| <b>Association with having a WBC count outside the reference range.</b> |                        |                   |               |                       |
|-------------------------------------------------------------------------|------------------------|-------------------|---------------|-----------------------|
| <b>P-value threshold<sup>1</sup></b>                                    | <b># SNPs excluded</b> | <b>Odds-ratio</b> | <b>95% CI</b> | <b>P-value</b>        |
| 0.001                                                                   | 33                     | 0.58              | (0.53 - 0.63) | 1.9x10 <sup>-38</sup> |
| 0.005                                                                   | 124                    | 0.58              | (0.53 - 0.63) | 3.3x10 <sup>-37</sup> |
| 0.01                                                                    | 223                    | 0.58              | (0.53 - 0.63) | 4.2x10 <sup>-36</sup> |
| 0.05                                                                    | 753                    | 0.60              | (0.55 - 0.65) | 4.8x10 <sup>-31</sup> |
| <b>Association with ICD code for a low WBC count</b>                    |                        |                   |               |                       |
| <b>P-value threshold<sup>1</sup></b>                                    | <b># SNPs excluded</b> | <b>Odds-ratio</b> | <b>95% CI</b> | <b>P-value</b>        |
| 0.001                                                                   | 33                     | 0.63              | (0.57 - 0.70) | 2.6x10 <sup>-18</sup> |
| 0.005                                                                   | 124                    | 0.63              | (0.57 - 0.70) | 1.0x10 <sup>-17</sup> |
| 0.01                                                                    | 223                    | 0.63              | (0.57 - 0.70) | 1.5x10 <sup>-17</sup> |
| 0.05                                                                    | 753                    | 0.66              | (0.59 - 0.74) | 9.7x10 <sup>-14</sup> |

Notes:

1. Association p-value used to exclude SNPs based on association testing between the PGS<sub>WBC</sub> and 15 malignant hematological phenotypes.

**Supplemental Table 5: Characteristics of BioVU participants in the bone marrow biopsy cohort.**

| <b>Characteristic</b>                 | <b>All participants</b> | <b>Participants with a normal biopsy</b> | <b>Participants with an abnormal biopsy</b> |
|---------------------------------------|-------------------------|------------------------------------------|---------------------------------------------|
| n                                     | 117                     | 82                                       | 35                                          |
| Age (years) [mean (s.d.)]             | 48.4 (24.5)             | 44.4 (24.9)                              | 58.0 (21.0)                                 |
| Males (n [%])                         | 53 (45.3%)              | 34 (41.5%)                               | 19 (54.3%)                                  |
| Age<18 years (n [%])                  | 19 (16.2%)              | 16 (19.5%)                               | 3 (8.6%)                                    |
| <b>Indication for biopsy (n [%]):</b> |                         |                                          |                                             |
| Low WBC count                         | 76 (65%)                | 53 (64.6%)                               | 23 (65.7%)                                  |
| Neutropenia (n [%])                   | 51 (43.6%)              | 37 (45.1%)                               | 14 (40%)                                    |
| <b>Listed comorbidities (n [%]):</b>  |                         |                                          |                                             |
| Any hematological diagnosis           | 66 (56.4%)              | 37 (45.1%)                               | 29 (82.9%)                                  |
| Thrombocytopenia                      | 30 (25.6%)              | 19 (23.2%)                               | 11 (31.4%)                                  |
| Anemia                                | 40 (34.2%)              | 22 (26.8%)                               | 18 (51.4%)                                  |
| Other hematological issue             | 13 (11.1%)              | 7 (8.5%)                                 | 6 (17.1%)                                   |
| Other non-hematological diagnosis     | 13 (11.1%)              | 9 (11%)                                  | 4 (11.4%)                                   |
| <b>Biopsy results (n [%]):</b>        |                         |                                          |                                             |
| Normal biopsy (no pathology)          | 82 (70.1%)              | 82 (100%)                                | 0 (0%)                                      |
| Any WBC-related abnormality           | 28 (23.9%)              | 0 (0%)                                   | 28 (80%)                                    |

**Supplemental Table 6: Sensitivity analyses examining the impacts of excluding SNPs from the PGS<sub>WBC</sub> that are nominally associated with hematological phenotypes at select significance thresholds on biopsy outcomes.** Odds ratios are from a logistic regression model, adjusted for age, sex and principal components. P-values are based on a 2-sided test.

| <b>P-value threshold<sup>1</sup></b> | <b># SNPs excluded</b> | <b>Odds-ratio<sup>2</sup></b> | <b>95% CI</b> | <b>P-value</b> |
|--------------------------------------|------------------------|-------------------------------|---------------|----------------|
| 0.001                                | 33                     | 0.59                          | (0.34 - 0.97) | 0.048          |
| 0.005                                | 124                    | 0.57                          | (0.32 - 0.96) | 0.04           |
| 0.01                                 | 223                    | 0.54                          | (0.30 - 0.94) | 0.04           |
| 0.05                                 | 753                    | 0.49                          | (0.26 - 0.85) | 0.02           |

Notes:

1. Association p-value used to exclude SNPs based on association testing between the PGS<sub>WBC</sub> and 15 malignant hematological phenotypes.
2. Odds-ratio for a having a biopsy outcome that does not identify disease.

**Supplemental Table 7: Characteristics of BioVU participants in the taxane leukopenia study.**

| <b>Characteristic</b>               | <b>All participants</b> |
|-------------------------------------|-------------------------|
| n                                   | 1724                    |
| Females (n [%])                     | 917 (53.2%)             |
| Age at treatment (mean [s.d.])      | 59.5 (12)               |
| Baseline WBC (x1000 cells/ $\mu$ l) | 8.2 (3.9)               |
| Baseline ANC (x1000 cells/ $\mu$ l) | 5.8 (3.7)               |
|                                     |                         |
| Cancer diagnosis:                   |                         |
| Bone/connective tissues cancer      | 7 (0.4%)                |
| Breast Cancer                       | 383 (22.2%)             |
| Hematopoietic                       | 5 (0.3%)                |
| Lung cancer                         | 256 (14.8%)             |
| Oral Cancer                         | 301 (17.5%)             |
| Respiratory cancer                  | 92 (5.3%)               |
| Genitourinary cancer                | 115 (6.7%)              |
| Other cancers                       | 565 (32.7%)             |
|                                     |                         |
| Drug treatment:                     |                         |
| Docetaxel (n [%])                   | 406 (23.5%)             |
| Paclitaxel (n [%])                  | 1318 (76.5%)            |
| Mean dose (mg/m <sup>2</sup> )      | 80.5 (47)               |
| Number treatments                   | 7.1 (6.3)               |
| Prior GCSF treatment (n [%])        | 419 (24.3%)             |
|                                     |                         |
| Outcomes:                           |                         |
| WBC<3000 cells/ $\mu$ l             | 266 (15.5%)             |
| Follow-up time (months)             | 0.8 (0.3)               |
| ANC<1500 cells/ $\mu$ l             | 228 (13.2%)             |
| Follow-up time (months)             | 0.8 (0.3)               |



**Supplemental Table 8: Characteristics of Michigan Genomics Initiative participants in the azathioprine leukopenia study.**

| <b>Characteristic</b>          | <b>All Subjects</b> |
|--------------------------------|---------------------|
| n                              | 354                 |
| Females                        | 203 (57.3%)         |
| Age at treatment (mean [s.d.]) | 43.5 (16.6)         |
|                                |                     |
| Baseline WBC (x1000 cells/ul)  | 8.8 (3.7)           |
| Final WBC (x1000 cells/ul)     | 7.3 (3.0)           |
| Change in WBC (x1000 cells/ul) | 1.5 (3.6)           |
|                                |                     |
| Incident events (n, %):        |                     |
| WBC count<3,000                | 17 (4.8%)           |
| WBC count<3,500                | 45 (12.7%)          |
| WBC count<4,000                | 67 (18.9%)          |
|                                |                     |
| Follow-up duration (months)    | 18.2 (9.0)          |

**Supplemental Table 9: Characteristics of participants in the azathioprine discontinuation study.**

| <b>Characteristic</b>                                 | <b>All participants</b> | <b>Participants discontinued</b> | <b>Participants not discontinued</b> |
|-------------------------------------------------------|-------------------------|----------------------------------|--------------------------------------|
| n                                                     | 1,180                   | 34                               | 1,146                                |
| Females (n [%])                                       | 787 (66.7%)             | 24 (70.6%)                       | 763 (66.6%)                          |
| Age (years) [mean (s.d.)]                             | 46.7 (15.2)             | 49.5 (18)                        | 46.6 (15.1)                          |
|                                                       |                         |                                  |                                      |
| Underlying diagnosis (n [%]):                         |                         |                                  |                                      |
| Lupus                                                 | 114 (9.7%)              | 3 (8.8%)                         | 111 (9.7%)                           |
| Inflammatory bowel disease                            | 418 (35.4%)             | 11 (32.4%)                       | 407 (35.5%)                          |
| Other                                                 | 648 (54.9%)             | 20 (58.8%)                       | 628 (54.8%)                          |
|                                                       |                         |                                  |                                      |
| Baseline WBC (x1,000 cells/ $\mu$ l)                  | 8.6 (3.4)               | 7 (3.7)                          | 8.6 (3.4)                            |
| Final WBC (x1,000 cells/ $\mu$ l)                     | 7.3 (3.4)               | 3.7 (1.7)                        | 7.5 (3.4)                            |
| Change in WBC (x1,000 cells/ $\mu$ l)                 | 1.4 (3.8)               | 3.9 (3.2)                        | 1.3 (3.8)                            |
|                                                       |                         |                                  |                                      |
| Initial dose (mg)                                     | 80.7 (48.9)             | 77.2 (45.8)                      | 80.8 (49)                            |
|                                                       |                         |                                  |                                      |
| Discontinued for low WBC or neutrophil counts (n [%]) | 34 (2.9%)               | 34 (100%)                        | 0 (0%)                               |
| Follow-up duration (months) (mean [s.d])              | 14.4 (10)               | 7.3 (5.8)                        | 14.6 (10.1)                          |

**Supplemental Table 10: List of keywords used to identify records with a mention of a low WBC count.**

| <b>Keyword</b>   |
|------------------|
| leukopenia       |
| leucopenia       |
| low white        |
| decreased white  |
| reduced white    |
| low wbc          |
| decreased wbc    |
| reduced wbc      |
| neutropenia      |
| low neutro       |
| decreased neutro |
| reduced neutro   |
| lymphopenia      |
| anc              |
| lymphopenia      |
| granulopenia     |
| agranulocytosis  |
| nutropenia       |
| neutropenai      |
| nuetropenia      |

**Supplemental Table 11: Diseases with associations reported in the GWAS catalog for which SNPs were excluded when constructing the WBC PGS.**

| <b>Disease</b>                                                                           |
|------------------------------------------------------------------------------------------|
| Systemic lupus erythematosus                                                             |
| Chronic lymphocytic leukemia                                                             |
| Multiple myeloma                                                                         |
| Myeloproliferative neoplasms                                                             |
| Hodgkin's lymphoma                                                                       |
| Follicular lymphoma                                                                      |
| Lymphoma                                                                                 |
| Nodular sclerosis Hodgkin lymphoma                                                       |
| Acute lymphoblastic leukemia in childhood (B cell precursor)                             |
| Lymphocytic leukemia                                                                     |
| Marginal zone lymphoma                                                                   |
| Acute lymphoblastic leukemia (B-cell precursor)                                          |
| Acute lymphoblastic leukemia (childhood)                                                 |
| B-cell acute lymphoblastic leukaemia                                                     |
| B-cell malignancies (chronic lymphocytic leukemia, Hodgkin lymphoma or multiple myeloma) |
| Diffuse large B cell lymphoma                                                            |
| Extranodal natural killer T-cell lymphoma (nasal type)                                   |
| Multiple myeloma (hyperdiploidy)                                                         |
| Multiple myeloma (IgH translocation)                                                     |
| Multiple myeloma and monoclonal gammopathy                                               |
| Primary central nervous system lymphoma                                                  |
| Severe aplastic anemia                                                                   |
