# Supplementary material for: Clinical associations with a polygenic predisposition to benign lower white blood cell counts
Source: PubMed Central journal article supplement (PMC11035609; doi:10.1038/s41467-024-47804-5), 2024-04-22
Supplement: 41467_2024_47804_MOESM3_ESM.pdf [file 41467_2024_47804_MOESM3_ESM.pdf]

## **Description of Additional Supplementary Files**

File Name: Supplementary Data 1

Description: ICD-9 and ICD-10 codes related to chemotherapies and hematological diagnoses.

File Name: Supplementary Data 2

Description: SNPs and weightings retained in the WBC PGS.
